# Supplementary material for: Evaluation of severe rhabdomyolysis on day 30 mortality in trauma patients admitted to intensive care: a propensity score analysis of the Traumabase registry
Source: PubMed Central journal article supplement — Crit Care. 2024 Nov 22;28:382. doi: 10.1186/s13054-024-05158-w (PMC11585242; doi:10.1186/s13054-024-05158-w), 2024-11-22
Supplement: 13054_2024_5158_MOESM3_ESM.pdf [file 13054_2024_5158_MOESM3_ESM.pdf]

**Figure S1**

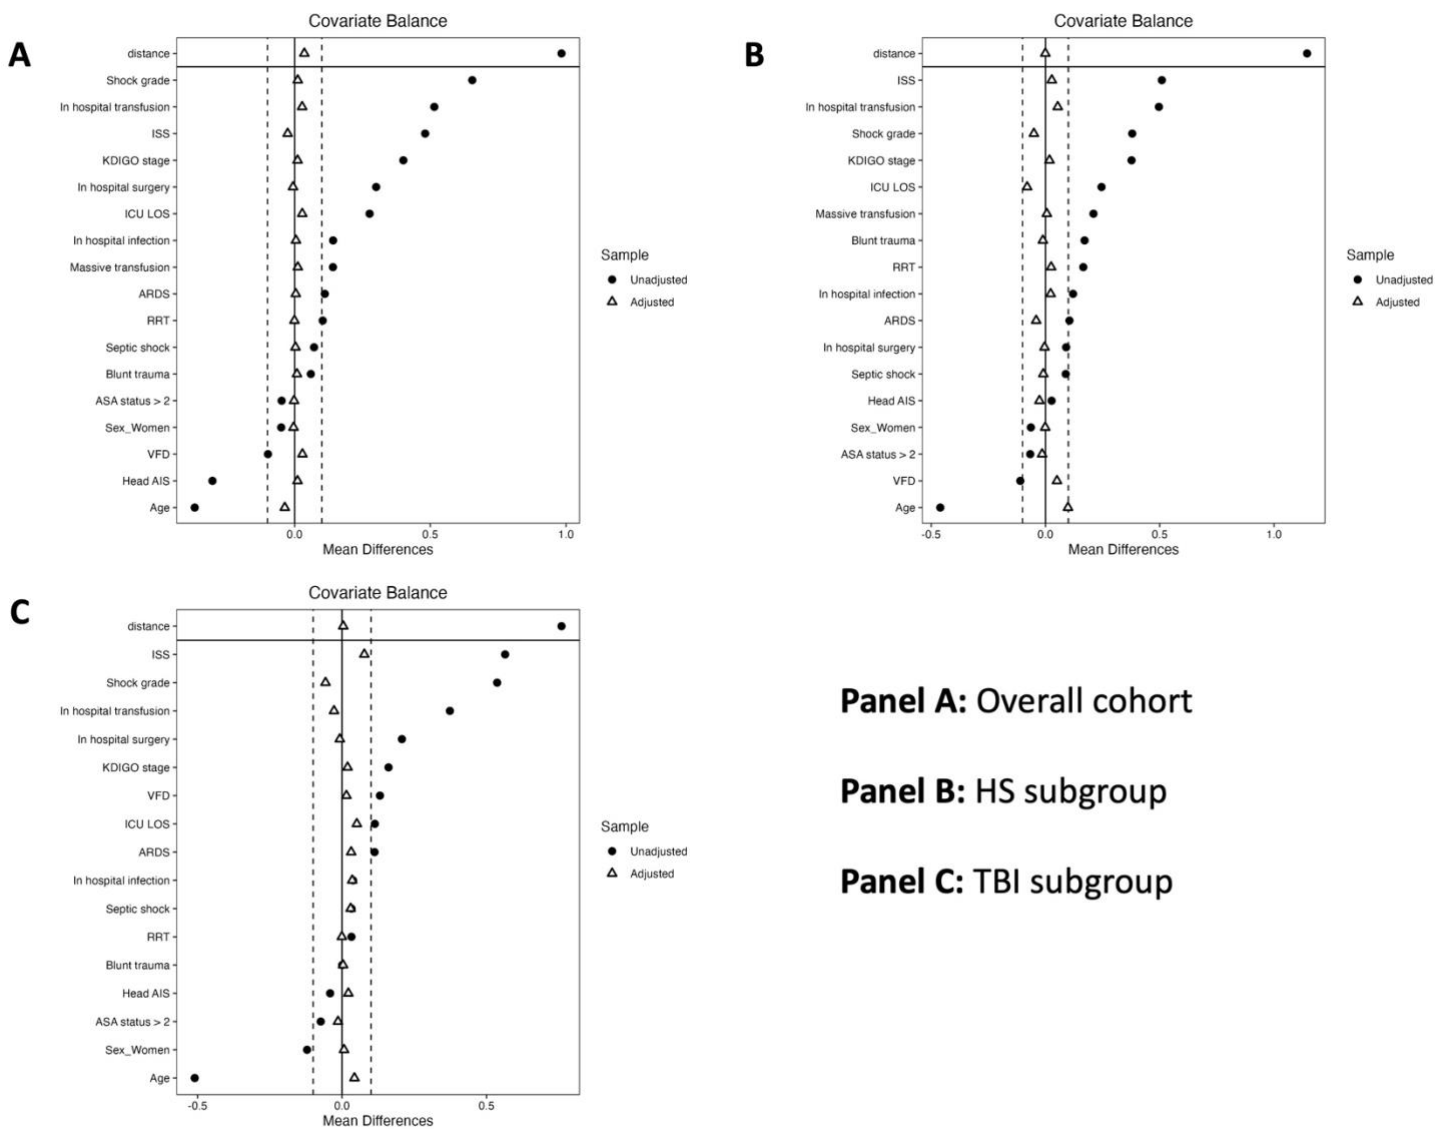

**Imbalance in patient characteristics before and after weighting by the inverse probability of treatment.**

Black points represent imbalance before IPTW, and black triangles represent imbalance after IPTW.

Panel A: overall cohort; Panel B: HS subgroup; Panel C: TBI subgroup

Figure S2

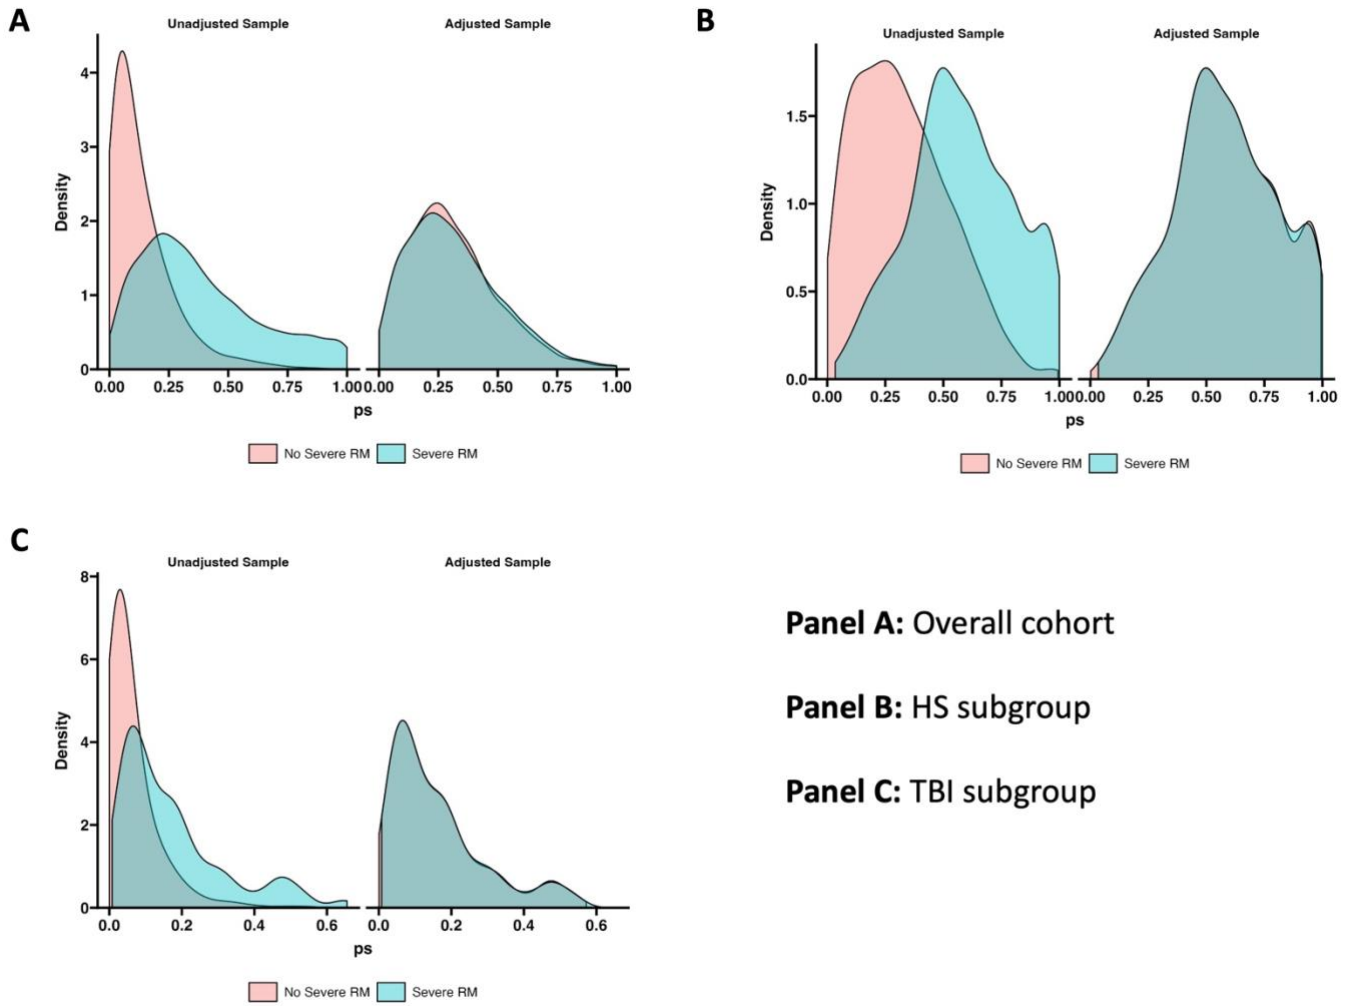

**Panel A:** Overall cohort

**Panel B:** HS subgroup

**Panel C:** TBI subgroup

**Propensity score (ps) common support (Kernel plots) before and after weighting by the inverse probability of treatment.**

Panel A: overall cohort; Panel B: HS subgroup; Panel C: TBI subgroup
